# Supplementary material
Source: HighWire-hosted journal article supplement (http://jpet.aspetjournals.org/highwire/filestream/136510/field_highwire_adjunct_files/0/jpet221242_suppl_data.pdf)
Supplement: jpet221242_suppl_data.pdf [file jpet221242_suppl_data.pdf]

**Supplemental Data.**

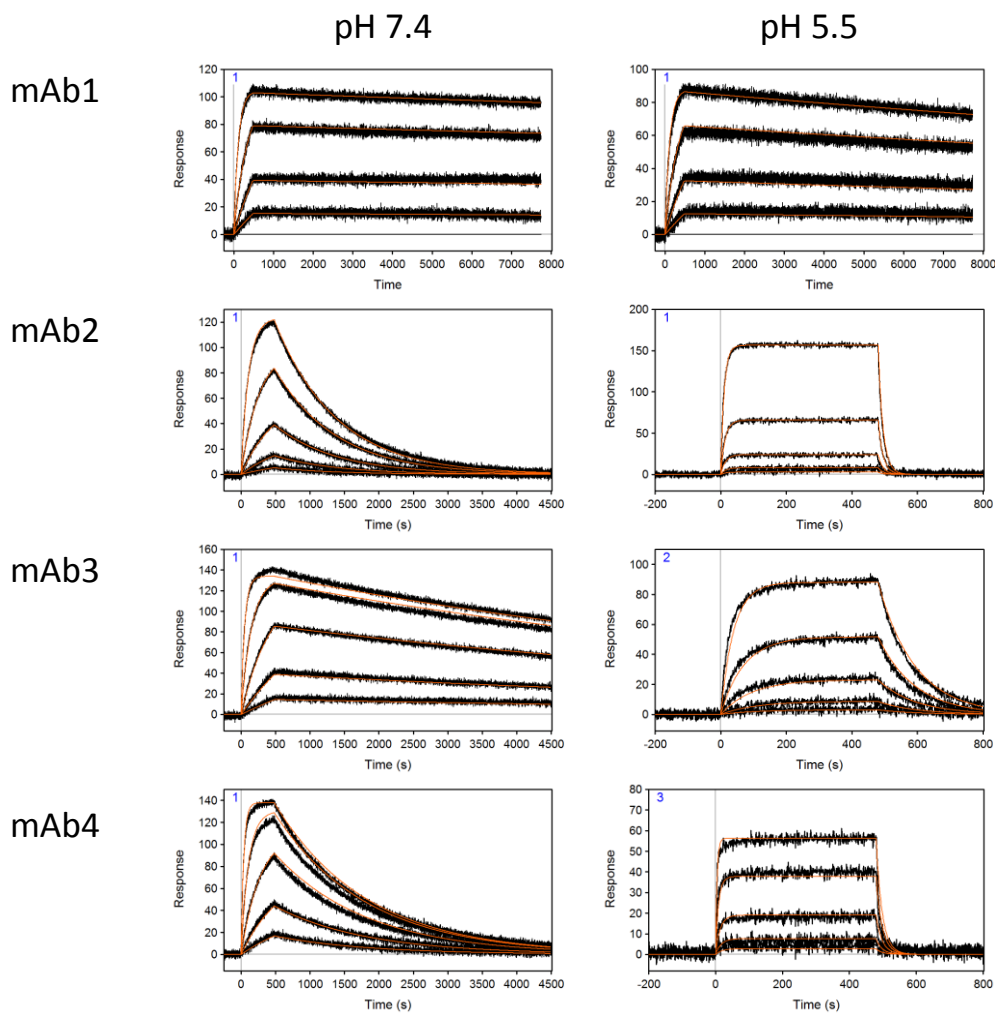

**Supplemental Figure 1.** Representative SPR sensorgrams characterizing mAb1, mAb2, mAb3, and mAb4 Fab fragment binding to cynomolgus monkey PCSK9 surfaces at pH 7.4 and 5.5. Raw data (black lines) and the results from non-linear least squares regression analysis of the data fit to a 1:1 binding model (red lines) are shown.

Henne, et al. Anti-PCSK9 Antibody Pharmacokinetics and LDL-C Pharmacodynamics in Non-Human Primates Are Antigen Affinity-Dependent and Exhibit Limited Sensitivity to FcRn Binding Enhancement. *J. Pharmacol. Exp. Ther.* (JPET #221242)

**Supplemental Table 1.** Study 1 Pairwise Comparison p-Values for CL/F (upper, red) and  $t_{1/2,z}$  (lower, blue).

|         | mAb1             | mAb2             | mAb3             | mAb4             | Control          |
|---------|------------------|------------------|------------------|------------------|------------------|
| mAb1    |                  | <b>&lt;0.001</b> | <b>&lt;0.001</b> | <b>&lt;0.001</b> | <b>&lt;0.001</b> |
| mAb2    | <b>&lt;0.001</b> |                  | <b>&lt;0.001</b> | 0.088            | 0.927            |
| mAb3    | 0.193            | <b>0.009</b>     |                  | <b>0.012</b>     | <b>&lt;0.001</b> |
| mAb4    | <b>0.006</b>     | 0.102            | 0.138            |                  | 0.072            |
| Control | <b>&lt;0.001</b> | 0.138            | <b>&lt;0.001</b> | <b>0.005</b>     |                  |

Bold text indicates statistical significance ( $p < 0.05$ ).

**Supplemental Table 2.** Study 1 Adjusted p-Values for LDL-C Difference from Baseline by Time Point.

| Time (d) | Adjusted p-Value |                  |                  |                  |
|----------|------------------|------------------|------------------|------------------|
|          | mAb1             | mAb2             | mAb3             | mAb4             |
| 1        | <b>&lt;.0001</b> | <b>0.0002</b>    | <b>&lt;.0001</b> | <b>&lt;.0001</b> |
| 2        | <b>&lt;.0001</b> | <b>&lt;.0001</b> | <b>&lt;.0001</b> | <b>&lt;.0001</b> |
| 3        | <b>&lt;.0001</b> | <b>&lt;.0001</b> | <b>&lt;.0001</b> | <b>&lt;.0001</b> |
| 4        | <b>&lt;.0001</b> | <b>&lt;.0001</b> | <b>&lt;.0001</b> | <b>&lt;.0001</b> |
| 6        | <b>&lt;.0001</b> | <b>&lt;.0001</b> | <b>&lt;.0001</b> | <b>&lt;.0001</b> |
| 9        | 0.5857           | <b>&lt;.0001</b> | <b>&lt;.0001</b> | <b>&lt;.0001</b> |
| 12       | 0.5843           | <b>&lt;.0001</b> | <b>&lt;.0001</b> | <b>&lt;.0001</b> |
| 15       | 0.2238           | <b>&lt;.0001</b> | <b>&lt;.0001</b> | <b>&lt;.0001</b> |
| 18       | 0.6714           | <b>&lt;.0001</b> | <b>0.0032</b>    | <b>&lt;.0001</b> |
| 21       | 1                | <b>&lt;.0001</b> | 0.0918           | <b>&lt;.0001</b> |
| 24       | 1                | <b>&lt;.0001</b> | 0.4552           | <b>&lt;.0001</b> |
| 27       | 1                | <b>&lt;.0001</b> | 1                | <b>&lt;.0001</b> |
| 30       | 1                | <b>0.0001</b>    | 0.1655           | <b>&lt;.0001</b> |
| 33       | 1                | <b>0.0009</b>    | 0.1787           | <b>0.0003</b>    |
| 36       | 0.7912           | <b>0.008</b>     | 1                | <b>0.0104</b>    |
| 39       | 1                | <b>0.0016</b>    | 1                | <b>0.0105</b>    |
| 42       | 0.5254           | <b>0.0022</b>    | 0.3671           | 0.0548           |
| 45       | 1                | <b>0.0078</b>    | 1                | 0.0826           |
| 48       | 0.8843           | <b>0.0509</b>    | 0.5419           | 0.2091           |
| 51       | 0.5623           | <b>0.019</b>     | 0.8267           | 0.211            |

Bold text indicates statistical significance ( $p < 0.05$ ).

Henne, et al. Anti-PCSK9 Antibody Pharmacokinetics and LDL-C Pharmacodynamics in Non-Human Primates Are Antigen Affinity-Dependent and Exhibit Limited Sensitivity to FcRn Binding Enhancement. *J. Pharmacol. Exp. Ther.* (JPET #221242)

**Supplemental Table 3.** Study 2 Pairwise Comparison p-Values for CL/F (upper, red) and  $t_{1/2,z}$  (lower, blue).

|          | mAb1  | mAb1_YTE | mAb1_LS | mAb2  | mAb2_YTE | mAb2_LS |
|----------|-------|----------|---------|-------|----------|---------|
| mAb1     |       | 0.985    | 0.992   |       |          |         |
| mAb1_YTE | 0.999 |          | 0.994   |       |          |         |
| mAb1_LS  | 0.991 | 0.992    |         |       |          |         |
| mAb2     |       |          |         |       | 0.971    | 0.991   |
| mAb2_YTE |       |          |         | 0.119 |          | 0.959   |
| mAb2_LS  |       |          |         | 0.317 | 0.952    |         |

**Supplemental Table 4.** Study 2 Adjusted p-Values for LDL-C Difference from Baseline by Time Point.

| Time (d) | Adjusted p-Value |                  |                  |                  |                  |                  |
|----------|------------------|------------------|------------------|------------------|------------------|------------------|
|          | mAb1             | mAb1_YTE         | mAb1_LS          | mAb2             | mAb2_YTE         | mAb2_LS          |
| 0.04     | <b>0.0013</b>    | 0.1145           | <b>0.0206</b>    | 1                | 0.0796           | 0.6943           |
| 0.34     | <b>0.0003</b>    | <b>0.0004</b>    | <b>0.0038</b>    | 0.0978           | <b>0.0003</b>    | 0.0702           |
| 1        | <b>&lt;.0001</b> | <b>&lt;.0001</b> | <b>0.0004</b>    | <b>0.0332</b>    | <b>&lt;.0001</b> | <b>0.0053</b>    |
| 3        | <b>&lt;.0001</b> | <b>&lt;.0001</b> | <b>&lt;.0001</b> | <b>&lt;.0001</b> | <b>&lt;.0001</b> | <b>&lt;.0001</b> |
| 7        | <b>&lt;.0001</b> | <b>&lt;.0001</b> | <b>&lt;.0001</b> | <b>0.0023</b>    | <b>0.0006</b>    | <b>0.0021</b>    |
| 10       | <b>0.0037</b>    | <b>0.0027</b>    | <b>0.0007</b>    | <b>0.0505</b>    | <b>0.0395</b>    | <b>0.0168</b>    |
| 14       | 1                | 0.1625           | 0.8593           | <b>&lt;.0001</b> | <b>&lt;.0001</b> | <b>&lt;.0001</b> |
| 17       | 1                | 0.0379           | 1                | <b>0.0005</b>    | <b>&lt;.0001</b> | <b>&lt;.0001</b> |
| 21       | 1                | 0.2957           | 1                | <b>0.0001</b>    | <b>&lt;.0001</b> | <b>&lt;.0001</b> |
| 24       | 1                | 0.0768           | 1                | <b>&lt;.0001</b> | <b>&lt;.0001</b> | <b>&lt;.0001</b> |
| 28       | 1                | 1                | 1                | <b>&lt;.0001</b> | <b>&lt;.0001</b> | <b>&lt;.0001</b> |
| 31       | 1                | 1                | 1                | <b>0.0001</b>    | <b>&lt;.0001</b> | <b>&lt;.0001</b> |
| 35       | 1                | 1                | 1                | <b>0.0223</b>    | <b>&lt;.0001</b> | <b>&lt;.0001</b> |
| 42       | 1                | 1                | 1                | 0.1544           | <b>&lt;.0001</b> | <b>&lt;.0001</b> |
| 49       | 1                | 1                | 1                | 1                | 0.0562           | <b>0.0023</b>    |
| 56       | 1                | 0.382            | 1                | 0.1337           | 0.0031           | <b>&lt;.0001</b> |
| 63       | --               | --               | --               | 1                | 0.4476           | 0.139            |
| 70       | --               | --               | --               | 1                | 0.6933           | 0.1125           |

Bold text indicates statistical significance ( $p < 0.05$ ).

Henne, et al. Anti-PCSK9 Antibody Pharmacokinetics and LDL-C Pharmacodynamics in Non-Human Primates Are Antigen Affinity-Dependent and Exhibit Limited Sensitivity to FcRn Binding Enhancement. *J. Pharmacol. Exp. Ther.* (JPET #221242)

**Supplemental Table 5.** Study 3 Pairwise Comparison p-Values for CL/F (upper, red) and  $t_{1/2,z}$  (lower, blue).

|          | mAb2         | mAb2_8       | mAb2_119     | mAb3         | mAb3_8           | mAb3_119         |
|----------|--------------|--------------|--------------|--------------|------------------|------------------|
| mAb2     |              | <b>0.282</b> | <b>0.903</b> |              |                  |                  |
| mAb2_8   | <b>0.525</b> |              | <b>0.270</b> |              |                  |                  |
| mAb2_119 | <b>0.989</b> | <b>0.234</b> |              |              |                  |                  |
| mAb3     |              |              |              |              | <b>&lt;0.001</b> | <b>&lt;0.001</b> |
| mAb3_8   |              |              |              | <b>0.914</b> |                  | <b>0.541</b>     |
| mAb3_119 |              |              |              | <b>0.984</b> | <b>0.971</b>     |                  |

Bold text indicates statistical significance ( $p < 0.05$ ).

**Supplemental Table 6.** Study 3 Adjusted p-Values for LDL-C Difference from Baseline by Time Point.

| Time (d) | Adjusted p-Value |                  |                  |                  |                  |                  |
|----------|------------------|------------------|------------------|------------------|------------------|------------------|
|          | mAb2             | mAb2_8           | mAb2_119         | mAb3             | mAb3_8           | mAb3_119         |
| 0.01     | 0.7962           | 0.9195           | 0.5829           | 0.1034           | 0.7042           | 1                |
| 0.04     | 1                | 1                | 1                | 0.0248           | 1                | 1                |
| 0.17     | 0.1536           | 0.8056           | 1                | 1                | 0.6843           | 1                |
| 2        | <b>&lt;.0001</b> | <b>0.0023</b>    | <b>0.0007</b>    | <b>0.0011</b>    | <b>&lt;.0001</b> | <b>0.0012</b>    |
| 4        | <b>&lt;.0001</b> | <b>0.0013</b>    | <b>&lt;.0001</b> | <b>&lt;.0001</b> | <b>&lt;.0001</b> | <b>&lt;.0001</b> |
| 8        | <b>&lt;.0001</b> | <b>&lt;.0001</b> | <b>&lt;.0001</b> | <b>&lt;.0001</b> | <b>&lt;.0001</b> | <b>&lt;.0001</b> |
| 11       | <b>&lt;.0001</b> | <b>0.0003</b>    | <b>&lt;.0001</b> | <b>&lt;.0001</b> | <b>&lt;.0001</b> | <b>&lt;.0001</b> |
| 15       | <b>&lt;.0001</b> | <b>&lt;.0001</b> | <b>&lt;.0001</b> | 0.3822           | <b>&lt;.0001</b> | <b>&lt;.0001</b> |
| 18       | <b>&lt;.0001</b> | <b>&lt;.0001</b> | <b>&lt;.0001</b> | 0.5377           | <b>&lt;.0001</b> | <b>&lt;.0001</b> |
| 22       | <b>&lt;.0001</b> | <b>&lt;.0001</b> | <b>&lt;.0001</b> | 1                | 0.2541           | 1                |
| 25       | <b>0.0001</b>    | <b>&lt;.0001</b> | <b>&lt;.0001</b> | 1                | 1                | 1                |
| 29       | <b>&lt;.0001</b> | <b>&lt;.0001</b> | <b>0.0001</b>    | 1                | 1                | 1                |
| 32       | <b>&lt;.0001</b> | <b>&lt;.0001</b> | <b>0.0007</b>    | 1                | 1                | 1                |
| 36       | <b>0.0004</b>    | <b>0.0001</b>    | <b>&lt;.0001</b> | 1                | 1                | 1                |
| 43       | 0.1756           | <b>0.023</b>     | <b>0.0033</b>    | 1                | 1                | 1                |
| 50       | 1                | 0.6494           | 0.5103           | 1                | 1                | 0.6423           |
| 57       | 1                | 0.0384           | 0.2487           | 1                | 1                | 0.3707           |
| 64       | 1                | 0.014            | 0.0062           | 0.1845           | 1                | 1                |

Bold text indicates statistical significance ( $p < 0.05$ ).
